# Supplementary material for: The Early Induction of Suppressor of Cytokine Signaling 1 and the Downregulation of Toll-like Receptors 7 and 9 Induce Tolerance in Costimulated Macrophages
Source: PubMed Central journal article supplement — Mol Cells. 2014 Dec 15;38(1):26–32. doi: 10.14348/molcells.2015.2136 (PMC4314129; doi:10.14348/molcells.2015.2136), 2014-12-15
Supplement: molcell-38-1-26-supple.pdf [file molcell-38-1-26-supple.pdf]

**Figure S1.**

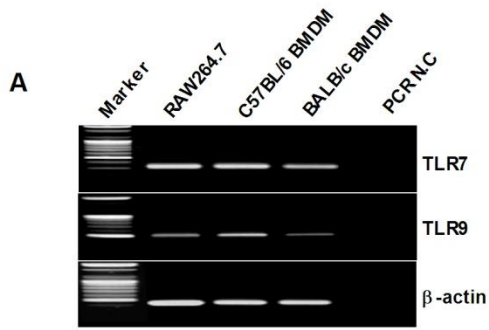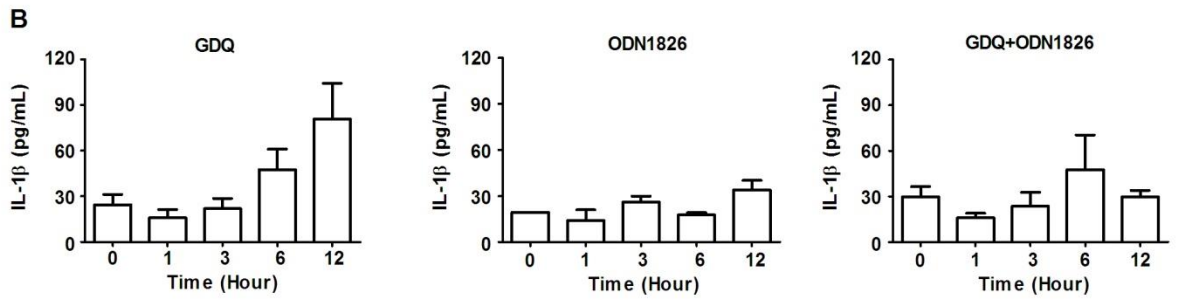

**Figure S2.**

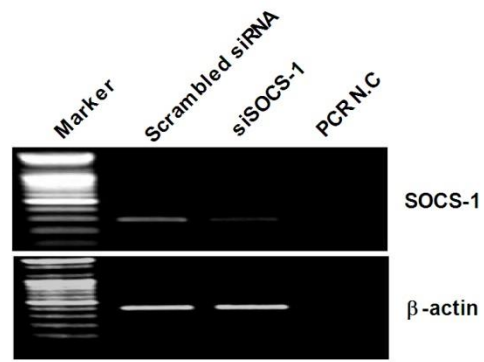

# Table S1.

Table 1. Primer sets designed for RT-PCR

| Gene                 | Forward primer           | Reverse primer             |
|----------------------|--------------------------|----------------------------|
| Mouse TLR7           | CGATGTGGACACG GAAGAGA    | CTGCAGCCTCTTGGT ACACA      |
| Mouse TLR9           | CCCTCCTGGTAGAGGCTGC      | TCTTGTAGTAGCAGTTCCCG       |
| Mouse SOCS-1         | TCC GATTACCGGCGCATCACG   | CTCCAGCAGCTCGAAAAG GCA     |
| Mouse SOCS-3         | CCCGCGGGCACCTTTCTTATC    | TCCAGGTGGCCGTTGACAGT       |
| Mouse IRAK-M         | CCTTCAGGTGTCCTTCTCCACTGT | CCTCTTCTCCATTGGCTTGCTCCCAT |
| Mouse $\beta$ -actin | AGGCTGTGCTGTCCCTGTATGC   | ACCCAAGAAGGAAGGCTGGAAA     |
